# Supplementary material
Source: publisher site journal article supplement (https://www.kjim.org/upload/media/kjim-2020-470-suppl2.pdf)
Supplement: Supplementary file 1 [file kjim-2020-470-suppl2.pdf]

**Supplementary Table 2. Diseases prescribed home oxygen therapy**

| Disease                                                                                  | No. (%)   |
|------------------------------------------------------------------------------------------|-----------|
| Chronic respiratory diseases <sup>a</sup> (e.g., COPD, ILD, lung cancer, bronchiectasis) | 30 (100)  |
| Congestive heart failure                                                                 | 7 (23.3)  |
| Patients with palliative and end-of-care disease                                         | 13 (43.3) |

COPD, chronic obstructive pulmonary disease; ILD, interstitial lung disease.

<sup>a</sup>Allowed multiple responses.
